# Supplementary material for: Unlocking the potential of thermally exfoliated ultrathin g-C3N4 nanosheets: abundant active sites for enhanced solar photocatalysis
Source: Royal Society of Chemistry journal article supplement (doi:10.1039/d3nj01946b), 2023-01-01
Supplement: d3nj01946b1.pdf [file d3nj01946b1.pdf]

## Supplementary Information

### Unlocking the Potential of Thermally Exfoliated Ultrathin g-C<sub>3</sub>N<sub>4</sub> Nanosheets: Abundant Active Sites for Enhanced Solar Photocatalysis

Suma Das<sup>1,2</sup>, Swapnamoy Pramanik<sup>3</sup>, Ranjith G Nair<sup>2§</sup>, Avijit Chowdhury<sup>1,3\*\*</sup>

<sup>1</sup>Organic Electronics & Sensor Laboratory, Department of Physics, National Institute of Technology  
Silchar, Assam 788010, India.

<sup>2</sup>Solar Energy Materials Research and Testing Laboratory (SMaRT Lab), Department of Physics,  
National Institute of Technology Silchar, Assam 788010, India.

<sup>3</sup>Department of Condensed Matter Physics and Material Sciences, S. N. Bose National Centre for  
Basic Sciences, Block JD, Sector-III, Salt Lake, Kolkata 700106, India.

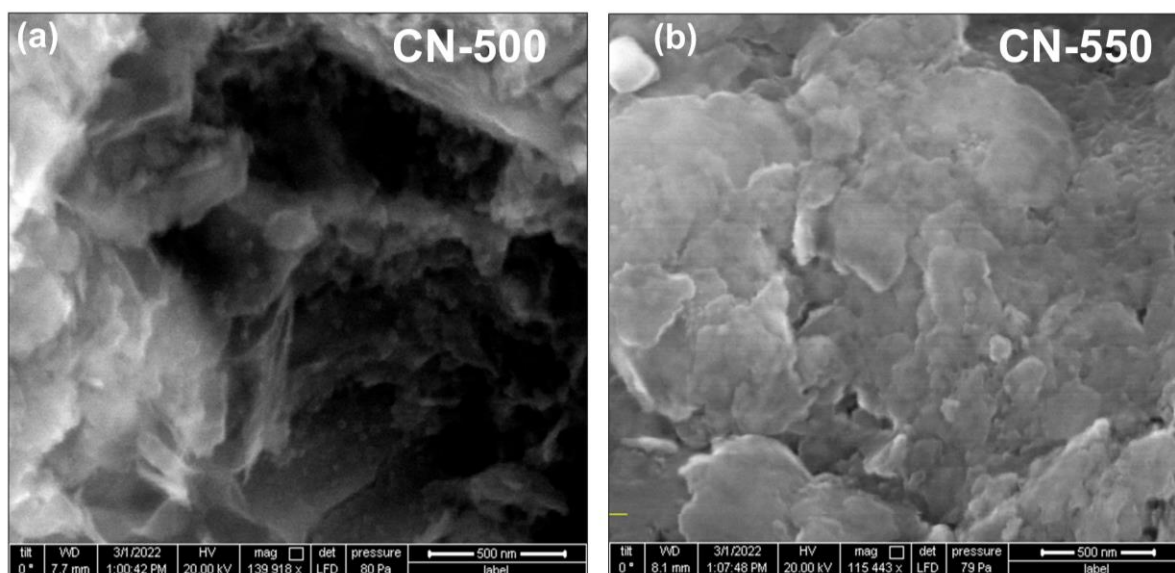

*Fig. S1 SEM images of CN-500 and CN-550*

---

#### Corresponding Authors

<sup>§</sup> Email: [rgnair@phy.nits.ac.in](mailto:rgnair@phy.nits.ac.in)

<sup>\*\*</sup> Email: [avijitiacs@gmail.com](mailto:avijitiacs@gmail.com), [avijitc@bose.res.in](mailto:avijitc@bose.res.in) (To whom the correspondence should be addressed)

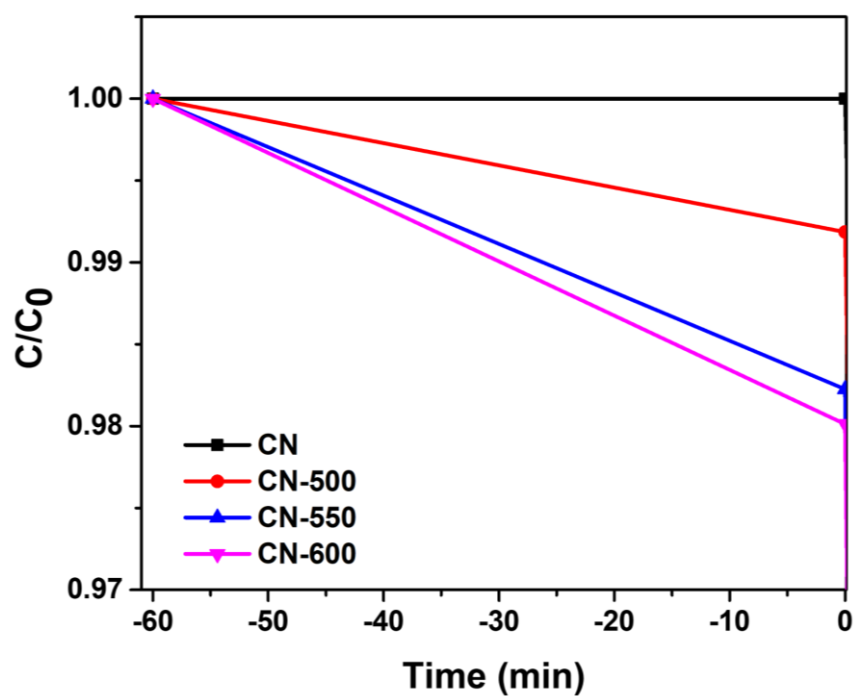

Fig. S2 The adsorption-desorption equilibrium curves for MB with CN, CN-500, CN-550 and CN-600 in dark.

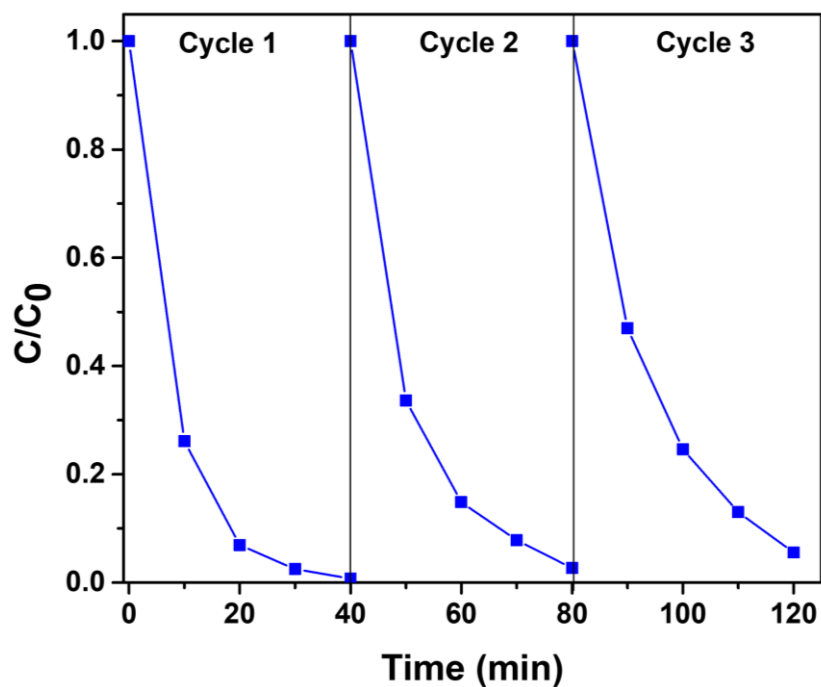

Fig. S3 stability measurement of CN-600 for photocatalytic MB dye degradation under solar light illumination.

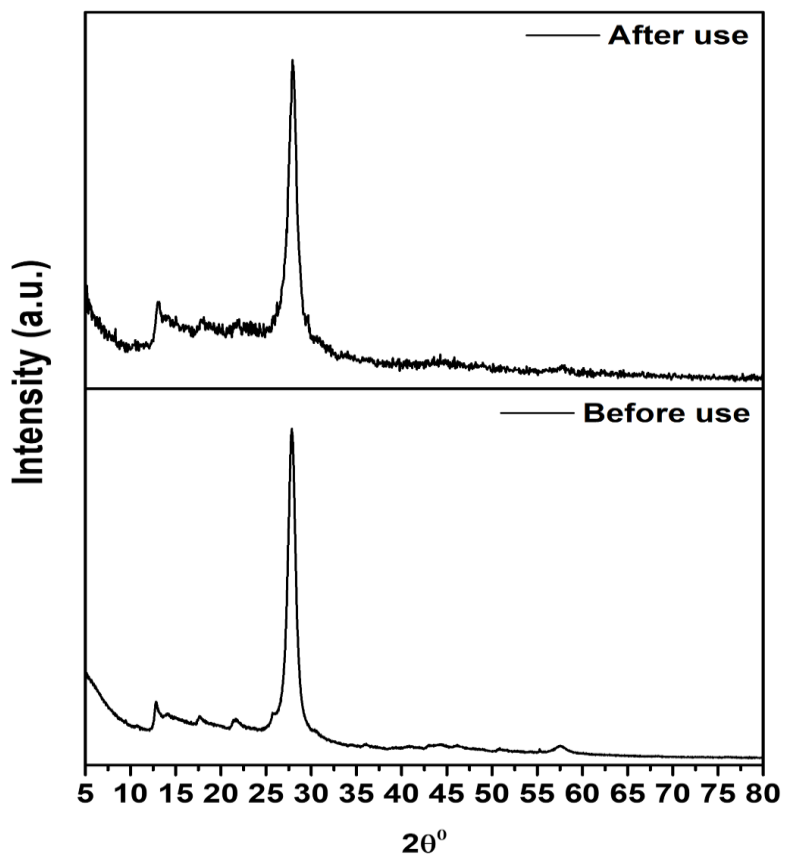

*Fig. S4 XRD pattern of CN-600 before and after three cyclic test*

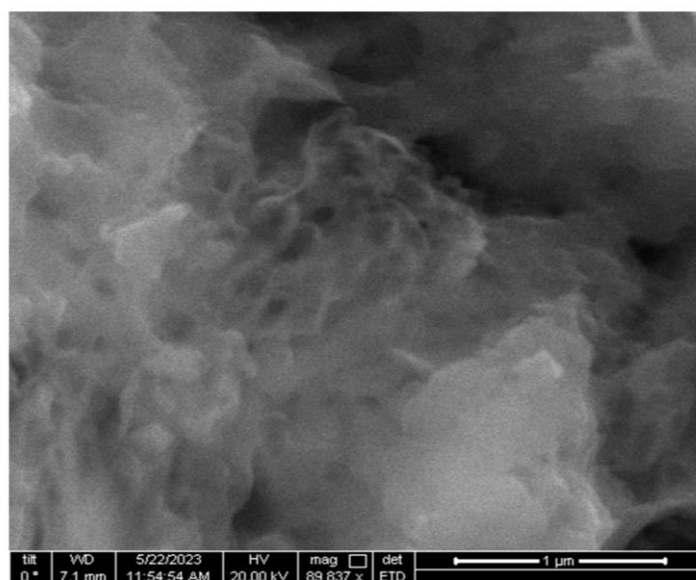

*Fig. S5 FESEM image of CN-600 after three cyclic test*

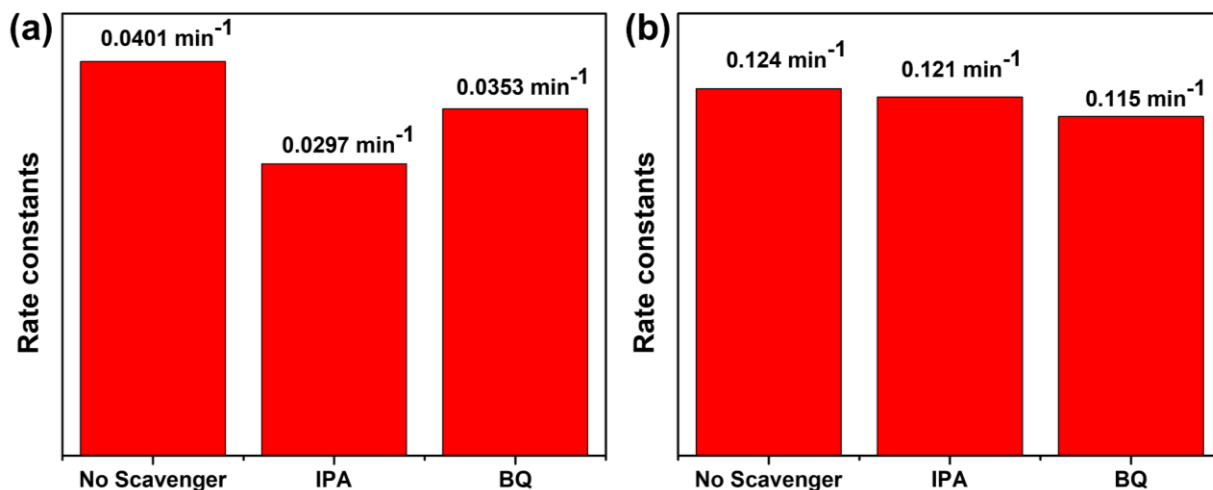

Fig. S6 Scavenger test of (a) CN and (b) CN-600 for photocatalytic MB dye degradation under solar light illumination.

Table S1: Comparative Analysis of SSA via different exfoliation technique and precursor

| Exfoliation Technique | Precursor       | Solvent                                          | Temp/Conc.                                                 | Exfoliation time (h) | SSA (m <sup>2</sup> g <sup>-1</sup> ) | Ref.      |
|-----------------------|-----------------|--------------------------------------------------|------------------------------------------------------------|----------------------|---------------------------------------|-----------|
| Liquid                | Melamine        | DI water                                         | 100ml                                                      | 14h                  | 41.68                                 | [16]      |
| Thermal               | Thiourea        | --                                               | 400 <sup>o</sup> C /500 <sup>o</sup> C /550 <sup>o</sup> C | 2h                   | 42, 49, 151                           | [18]      |
| Thermal               | Melamine        | IPA (10mg)                                       | 550 <sup>o</sup> C /5 <sup>o</sup> Cmin <sup>-1</sup>      | 2h                   | 104.12                                | [19]      |
| Thermal               | Melamine        | --                                               | 600 <sup>o</sup> C /10 <sup>o</sup> Cmin <sup>-1</sup>     | 2h                   | 14.76                                 | [20]      |
| Thermal               | Dicyandiamide   | NH <sub>4</sub> Cl (5g)                          | 600 <sup>o</sup> C /3 <sup>o</sup> Cmin <sup>-1</sup>      | 2h                   | 82.3                                  | [21]      |
| Thermal               | Dicyandiamide   | --                                               | 750 <sup>o</sup> C                                         | 10 min               | 70.2                                  | [22]      |
| Chemical              | Melamine        | HNO <sub>3</sub> (65wt%)/DI water                | 30ml/200ml                                                 | 8h/--                | 179.5                                 | [23]      |
| Chemical              | Melamine        | H <sub>2</sub> SO <sub>4</sub> /HNO <sub>3</sub> | 20ml/20ml                                                  | 5h                   | 109.30                                | [24]      |
| Chemical              | Melamine        | H <sub>2</sub> SO <sub>4</sub> (75%)/ DI water   | 30ml/200ml                                                 | --/2h                | 86.29                                 | [25]      |
| Chemical              | Melamine        | H <sub>2</sub> SO <sub>4</sub> (98%)/DI water    | 20ml/200ml                                                 | 6-8h/1.5h            | 55.41                                 | [26]      |
| Chemical              | Melamine        | H <sub>2</sub> SO <sub>4</sub>                   | 5ml                                                        | 24h                  | 35.27                                 | [27]      |
| Chemical              | Melamine        | Oxalic acid (1g/30ml H <sub>2</sub> O)           | 550 <sup>o</sup> C                                         | 2h                   | 70.41                                 | [28]      |
| Chemical              | Dicyandiamide   | H <sub>2</sub> SO <sub>4</sub> (98%)/ DI water   | 10ml/--                                                    | 8h/-                 | 53.9                                  | [29]      |
| Chemical              | Urea            | HCl                                              | 150mlConc.                                                 | 24h/1h               | 48.2                                  | [30]      |
| Thermal +Chemical     | Urea + Thiourea | HF(6wt%)                                         | 600 <sup>o</sup> C/70ml                                    | 2h-4h                | 121.4                                 | [32]      |
| Thermal               | Thiourea        | --                                               | 600 <sup>o</sup> C                                         | 2h                   | 167                                   | This Work |
